# Supplementary material
Source: PubMed Central journal article supplement (PMC7138684)
Supplement: nqaa037_supplemental_file.pdf [file nqaa037_supplemental_file.pdf]

A gene-diet interaction-based score predicts response to dietary fat in the Women’s Health Initiative.  
 Westerman et al.; Online Supplementary Material

Supplementary Table 1: Sample size necessary to achieve power of 0.8

| GxE variance explained (%) | N (nominal) | N (suggestive) | N (genome-wide) |
|----------------------------|-------------|----------------|-----------------|
| 0.05                       | 14046       | 49488          | 70866           |
| 0.10                       | 7021        | 24737          | 35423           |
| 0.50                       | 1401        | 4936           | 7069            |
| 1.00                       | 699         | 2461           | 3524            |

Power calculations were undertaken using the Quanto tool, with parameters set as follows: additive model, SNP main effect of 0.5% of trait variance, binary environment with 50% prevalence, and environmental effect explaining 10% of the trait variance.

Supplementary Table 2: Responder score effects on CRF changes in DM trial participants across main-effect filter thresholds

| CRF   | N <sup>1</sup> | All variants        |                  |         | Nominal main effect (p<0.05) |                  |         | Suggestive main effect (p<1e-5) |                  |         |
|-------|----------------|---------------------|------------------|---------|------------------------------|------------------|---------|---------------------------------|------------------|---------|
|       |                | # SNPs <sup>2</sup> | SES <sup>3</sup> | P-value | # SNPs <sup>2</sup>          | SES <sup>3</sup> | P-value | # SNPs <sup>2</sup>             | SES <sup>3</sup> | P-value |
| BMI   | 1988           | 158365              | 0.058            | 0.009   | 6042                         | 0.029            | 0.189   | 569                             | 0.027            | 0.221   |
| SBP   | 2004           | 153942              | -0.016           | 0.473   | 1536                         | 0.034            | 0.125   | 6                               | -0.003           | 0.899   |
| LDL-C | 145            | 156313              | 0.124            | 0.337   | 1760                         | -0.191           | 0.02    | 46                              | 0.000            | 1.000   |
| HDL-C | 150            | 153942              | 0.031            | 0.611   | 1731                         | -0.083           | 0.32    | 42                              | 0.086            | 0.244   |
| TG    | 150            | 152006              | -0.067           | 0.66    | 1774                         | -0.146           | 0.055   | 47                              | -0.034           | 0.661   |
| FG    | 281            | 161906              | -0.056           | 0.64    | 1924                         | 0.011            | 0.853   | 7                               | 0.004            | 0.952   |

<sup>1</sup> Sample size available with 1-year follow-up for each CRF

<sup>2</sup> Number of SNPs selected by the pruning-and-thresholding algorithm for each CRF-threshold combination

<sup>3</sup> Standardized effect size (SES) represents the regression coefficient estimate in terms of CRF standard deviation per responder score standard deviation

Online Supplementary Material: A gene-diet interaction-based score predicts response to dietary fat in the Women’s Health Initiative

Supplementary Table 3: Responder score effects on CRF changes in DM trial participants across ancestries

| CRF   | All combined   |                  |         | Black          |                  |         | Hispanic       |                  |         |
|-------|----------------|------------------|---------|----------------|------------------|---------|----------------|------------------|---------|
|       | N <sup>1</sup> | SES <sup>2</sup> | P-value | N <sup>1</sup> | SES <sup>2</sup> | P-value | N <sup>1</sup> | SES <sup>2</sup> | P-value |
| BMI   | 3606           | -0.019           | 0.263   | 1214           | 0.002            | 0.941   | 404            | 0.019            | 0.714   |
| SBP   | 3645           | 0.046            | 0.005   | 1230           | 0.011            | 0.692   | 411            | -0.016           | 0.744   |
| LDL-C | 422            | 0.084            | 0.068   | 206            | 0.06             | 0.373   | 71             | 0.124            | 0.24    |
| HDL-C | 430            | -0.059           | 0.24    | 206            | -0.087           | 0.242   | 74             | -0.032           | 0.815   |
| TG    | 430            | -0.073           | 0.122   | 206            | -0.02            | 0.778   | 74             | -0.1             | 0.424   |
| FG    | 572            | 0.077            | 0.048   | 214            | -0.01            | 0.876   | 77             | 0.006            | 0.961   |

<sup>1</sup> Sample size available with 1-year follow-up measurements for each CRF

<sup>2</sup> Std. effect size represents the regression coefficient estimate in terms of CRF standard deviation per responder score standard deviation

Supplementary Table 4: LDpred-based responder score effects on CRF changes in DM trial participants across causal variant fractions (F)

| CRF   | F = 0.001        |         | F = 0.01         |         | F = 0.1          |         |
|-------|------------------|---------|------------------|---------|------------------|---------|
|       | SES <sup>1</sup> | P-value | SES <sup>1</sup> | P-value | SES <sup>1</sup> | P-value |
| BMI   | 0.001            | 0.969   | 0.003            | 0.906   | 0.003            | 0.906   |
| SBP   | -0.016           | 0.478   | -0.011           | 0.617   | -0.011           | 0.625   |
| LDL-C | -0.038           | 0.652   | -0.051           | 0.555   | -0.053           | 0.533   |
| HDL-C | 0.059            | 0.484   | 0.069            | 0.422   | 0.071            | 0.409   |
| TG    | 0.015            | 0.863   | 0.019            | 0.828   | 0.018            | 0.832   |
| FG    | 0.038            | 0.538   | 0.051            | 0.399   | 0.052            | 0.395   |

<sup>1</sup> Standardized effect size (SES) represents the regression coefficient estimate in terms of CRF standard deviation per responder score standard deviation

Supplementary Table 5: LDL-FRS effects on alternate CRF changes in DM trial participants

| Outcome risk factor | # SNPs in risk score | N <sup>1</sup> | Std. effect size <sup>2</sup> | P-value |      |
|---------------------|----------------------|----------------|-------------------------------|---------|------|
| BMI                 |                      | 1760           | 1988                          | -0.02   | 0.48 |
| SBP                 |                      | 1760           | 2004                          | 0.00    | 0.85 |
| HDL-C               |                      | 1760           | 150                           | -0.07   | 0.40 |
| TG                  |                      | 1760           | 150                           | 0.11    | 0.18 |
| FG                  |                      | 1760           | 281                           | 0.01    | 0.93 |

<sup>1</sup> Sample size available with 1-year follow-up measurements for each CRF

<sup>2</sup> Std. effect size represents the regression coefficient estimate in terms of CRF standard deviation per responder score standard deviation

Online Supplementary Material: A gene-diet interaction-based score predicts response to dietary fat in the Women's Health Initiative

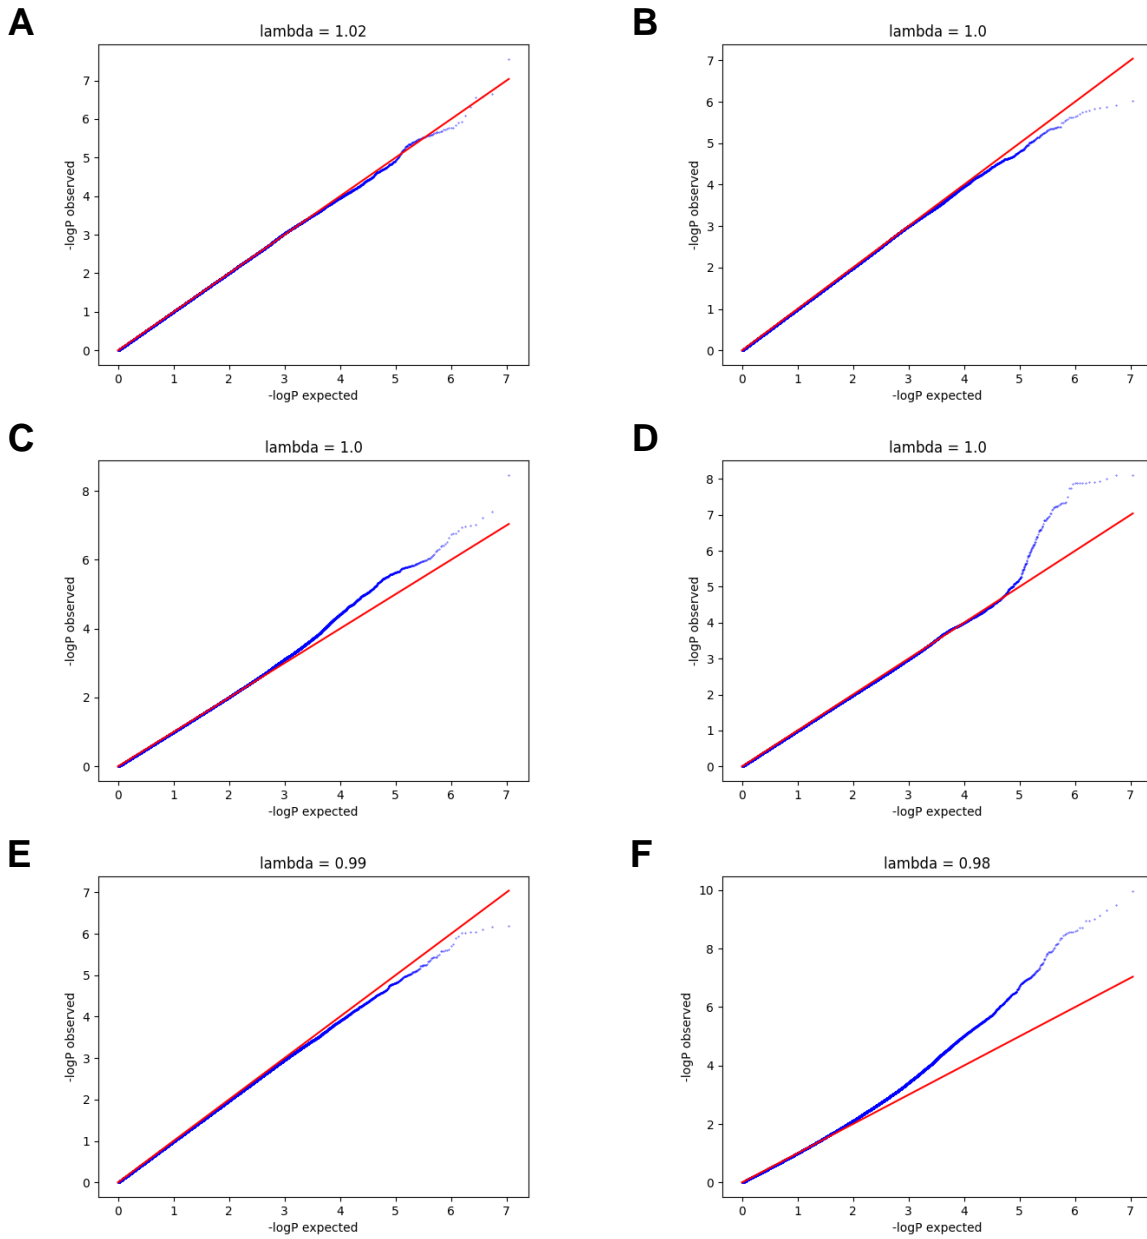

Supplementary Figure 1: Q-Q plots from individual CRF GWIS. The distribution of p-values from each GWIS is plotted against the expected uniform p-value distribution. Plots correspond to: A) BMI, B) SBP, C) LDL-C, D) HDL-C, E) TG, and F) FG. Lambda values above each plot represent genomic inflation estimates. BMI: body mass index, SBP: systolic blood pressure, LDL-C: LDL cholesterol, HDL-C: HDL cholesterol, TG: triglycerides, FG: fasting glucose.
